# Supplementary material for: Strategy to enhance the therapeutic effect of doxorubicin in human hepatocellular carcinoma by selenocystine, a synergistic agent that regulates the ROS-mediated signaling
Source: PubMed Central journal article supplement (PMC4058050; doi:10.18632/oncotarget.1854), 2014-03-25
Supplement: oncotarget-05-2853-s001.pdf [file oncotarget-05-2853-s001.pdf]

**Strategy to enhance the therapeutic effect of doxorubicin in human  
hepatocellular carcinoma by selenocystine, a synergistic agent that regulates the  
ROS-mediated signaling**

Cundong Fan<sup>1</sup>, Wenjie Zheng<sup>\*,1</sup>, Xiaoyan Fu<sup>1</sup>, Xiaoling Li<sup>1</sup>, Yum-Shing Wong<sup>2</sup>,  
Tianfeng Chen<sup>\*,1</sup>

<sup>1</sup>Department of Chemistry, Jinan University, Guangzhou 510632, China

<sup>2</sup>School of Life Sciences and State Key Laboratory of Agrobiotechnology, The  
Chinese University of Hong Kong, Hong Kong S.A.R., China

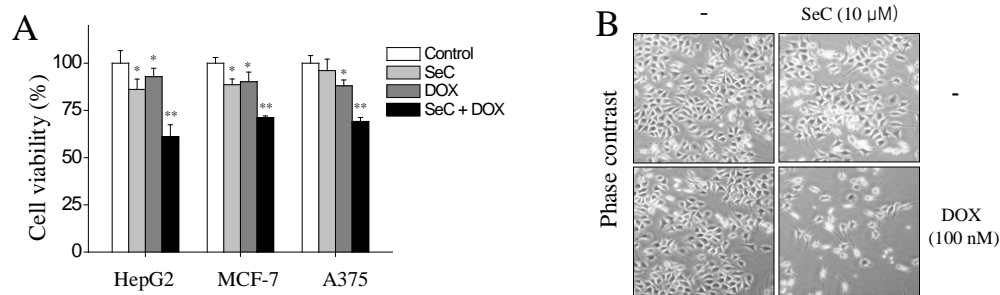

**Figure S1. Cytotoxicity of SeC and DOX towards human cancer cells. A.**

Combined treatment-induced growth inhibition against human cancer cells. The cells exposed to 8 μM SeC for 24 h were co-incubated with 100 nM DOX for 24 h. Cell viability was determined by MTT assay. **B.** Changes of cell morphology. HepG2 cells after treatment with SeC (10 μM) or/and DOX 100 nM were observed by phase contrast microscope (Magnification, 200×). All data here are expressed as means ± SD of triplicates. The image shown here is representative of three independent experiments with similar results.

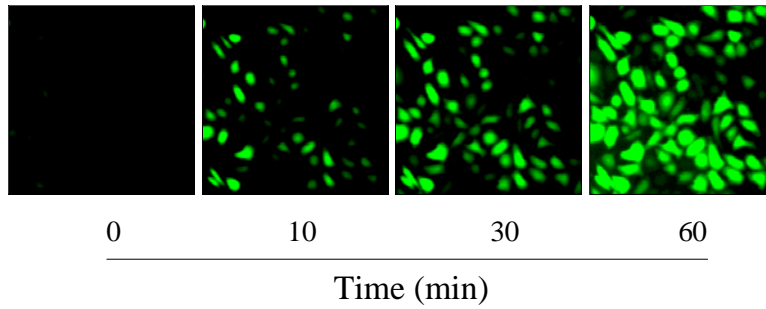

**Figure S2. SeC induces time-dependent intracellular ROS accumulation.** HepG2 cells were treated with 10  $\mu$ M SeC for 0, 10, 30 and 60 min and then imaged by fluorescence microscope (magnification, 200 $\times$ ). The image shown here is representative of three independent experiments with similar results.

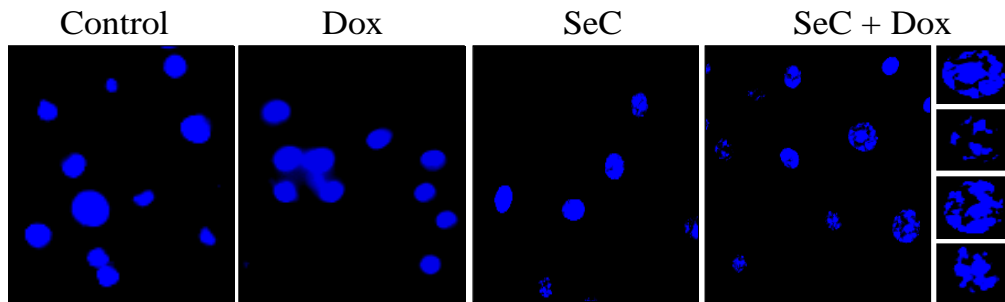

**Figure S3. SeC enhances Dox-induced DNA damage.** HepG2 cells cultured in chamber slides were pretreated with 10  $\mu$ M SeC for 24 h and co-treated with Dox for 24 h. Then cells were fixed with 3.7% formaldehyde for 10 min and incubated with 1  $\mu$ g/ml of DAPI for 15 min at 37 $^{\circ}$ C. The cells were then washed with PBS and examined under a fluorescence microscope (magnification, 200 $\times$ ). The image shown here is representative of three independent experiments with similar results.

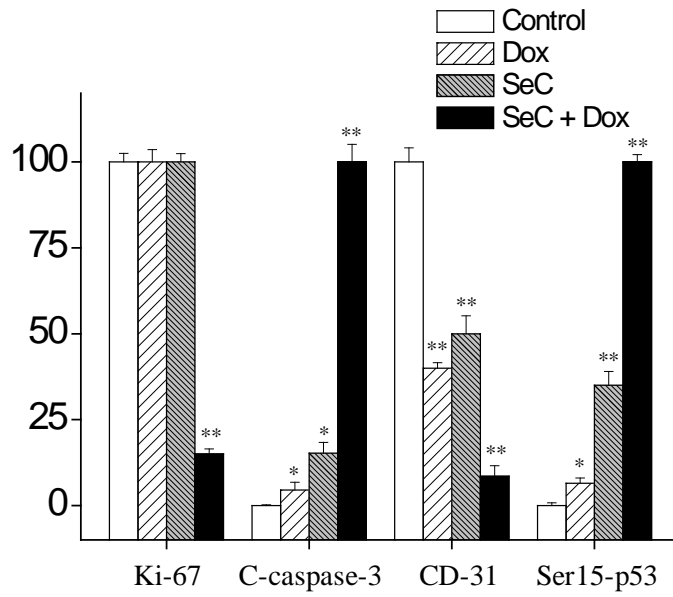

**Figure S4. Statistic analysis of proteins expression *in vivo*.** The protein expression was examined by IHC methods and analysed by Leica QW550 software. All data here are expressed as means  $\pm$  SD of triplicates
